# Supplementary material
Source: PubMed Central journal article supplement (PMC3243766)

**Supplemental Table 1. Summary of RTV metabolites.** WT mice were treated with 25 mg/kg RTV. The feces and urine were collected 18 h after RTV treatment. All samples were analyzed by UPLC-TOFMS.

| Metabolite ID | Observed m/z [M+H] | Calculated m/z [M+H] | Mass error (ppm) | Predicted molecular formula                                                   |
|---------------|--------------------|----------------------|------------------|-------------------------------------------------------------------------------|
| M1            | 582.2733           | 582.2750             | -2.9             | C <sub>30</sub> H <sub>40</sub> N <sub>5</sub> O <sub>5</sub> S               |
| M1-1          | 229.0651           | 229.0647             | 1.7              | C <sub>9</sub> H <sub>13</sub> N <sub>2</sub> O <sub>3</sub> S                |
| M1-2          | 303.0858           | 303.0837             | 6.9              | C <sub>12</sub> H <sub>19</sub> N <sub>2</sub> O <sub>3</sub> S <sub>2</sub>  |
| M2            | 737.3159           | 737.3155             | 0.5              | C <sub>37</sub> H <sub>49</sub> N <sub>6</sub> O <sub>6</sub> S <sub>2</sub>  |
| M3            | 737.3157           | 737.3155             | 0.3              | C <sub>37</sub> H <sub>49</sub> N <sub>6</sub> O <sub>6</sub> S <sub>2</sub>  |
| M4            | 737.3150           | 737.3155             | -0.7             | C <sub>37</sub> H <sub>49</sub> N <sub>6</sub> O <sub>6</sub> S <sub>2</sub>  |
| M5            | 737.3156           | 737.3155             | 0.1              | C <sub>37</sub> H <sub>49</sub> N <sub>6</sub> O <sub>6</sub> S <sub>2</sub>  |
| M6            | 737.3159           | 737.3155             | 0.5              | C <sub>37</sub> H <sub>49</sub> N <sub>6</sub> O <sub>6</sub> S <sub>2</sub>  |
| M7            | 580.3315           | 580.3321             | -1.0             | C <sub>32</sub> H <sub>46</sub> N <sub>5</sub> O <sub>3</sub> S               |
| M7-1          | 187.0189           | 187.0177             | 6.4              | C <sub>6</sub> H <sub>7</sub> N <sub>2</sub> O <sub>3</sub> S                 |
| M7-2          | 261.0376           | 261.0368             | 3.1              | C <sub>9</sub> H <sub>13</sub> N <sub>2</sub> O <sub>3</sub> S <sub>2</sub>   |
| M8            | 707.3052           | 707.3049             | 0.4              | C <sub>36</sub> H <sub>47</sub> N <sub>6</sub> O <sub>5</sub> S <sub>2</sub>  |
| M9            | 719.3044           | 719.3049             | -0.7             | C <sub>37</sub> H <sub>47</sub> N <sub>6</sub> O <sub>5</sub> S <sub>2</sub>  |
| M10           | 709.3370           | 709.3383             | -1.8             | C <sub>36</sub> H <sub>49</sub> N <sub>6</sub> O <sub>7</sub> S               |
| M11           | 897.3539           | 897.3527             | 1.3              | C <sub>43</sub> H <sub>57</sub> N <sub>6</sub> O <sub>11</sub> S <sub>2</sub> |
| M12           | 694.3277           | 694.3274             | 0.4              | C <sub>36</sub> H <sub>48</sub> N <sub>5</sub> O <sub>7</sub> S               |
| M13           | 650.2652           | 650.2648             | 0.6              | C <sub>33</sub> H <sub>40</sub> N <sub>5</sub> O <sub>7</sub> S               |
| M14           | 596.3276           | 596.3271             | 0.8              | C <sub>32</sub> H <sub>46</sub> N <sub>5</sub> O <sub>4</sub> S               |
| M15           | 913.3483           | 913.3476             | 0.8              | C <sub>43</sub> H <sub>57</sub> N <sub>6</sub> O <sub>12</sub> S <sub>2</sub> |
| M16           | 723.2985           | 723.2999             | -1.9             | C <sub>36</sub> H <sub>47</sub> N <sub>6</sub> O <sub>6</sub> S <sub>2</sub>  |
| M17           | 710.3243           | 710.3224             | 2.7              | C <sub>36</sub> H <sub>48</sub> N <sub>6</sub> O <sub>8</sub> S               |
| M18           | 753.3119           | 753.3104             | 2.0              | C <sub>37</sub> H <sub>49</sub> N <sub>6</sub> O <sub>7</sub> S <sub>2</sub>  |
| M19           | 753.3100           | 753.3104             | -0.5             | C <sub>37</sub> H <sub>49</sub> N <sub>6</sub> O <sub>7</sub> S <sub>2</sub>  |
| M20           | 753.3096           | 753.3104             | -1.1             | C <sub>37</sub> H <sub>49</sub> N <sub>6</sub> O <sub>7</sub> S <sub>2</sub>  |
| M21           | 612.3220           | 612.3220             | 0                | C <sub>32</sub> H <sub>46</sub> N <sub>5</sub> O <sub>5</sub> S               |
| M22           | 751.2942           | 751.2948             | -0.6             | C <sub>37</sub> H <sub>47</sub> N <sub>6</sub> O <sub>7</sub> S <sub>2</sub>  |

**Supplemental Figure 1. Metabolomic analysis of mouse feces from the control group and RTV-treated group.** WT mice ( $n = 4$ ) were treated with vehicle or 25 mg/kg RTV (*p.o.*). The feces were collected 18 hours after RTV treatment. All samples were analyzed by UPLC-TOFMS. (A) Separation of control group and RTV-treated group in an OPLS-DA score plot. The  $t[1]P$  and  $t[2]O$  values represent the score of each sample in principal component 1 and 2, respectively. (B) Loading S-plot generated by OPLS-DA analysis. The X-axis is a measure of the relative abundance of ions and the Y-axis is a measure of the correlation of each ion to the model. The matrix data were processed from  $m/z$  500 to 1000. The top ranking ions are labeled. \*, in-source fragment; +Na, sodium adduct.

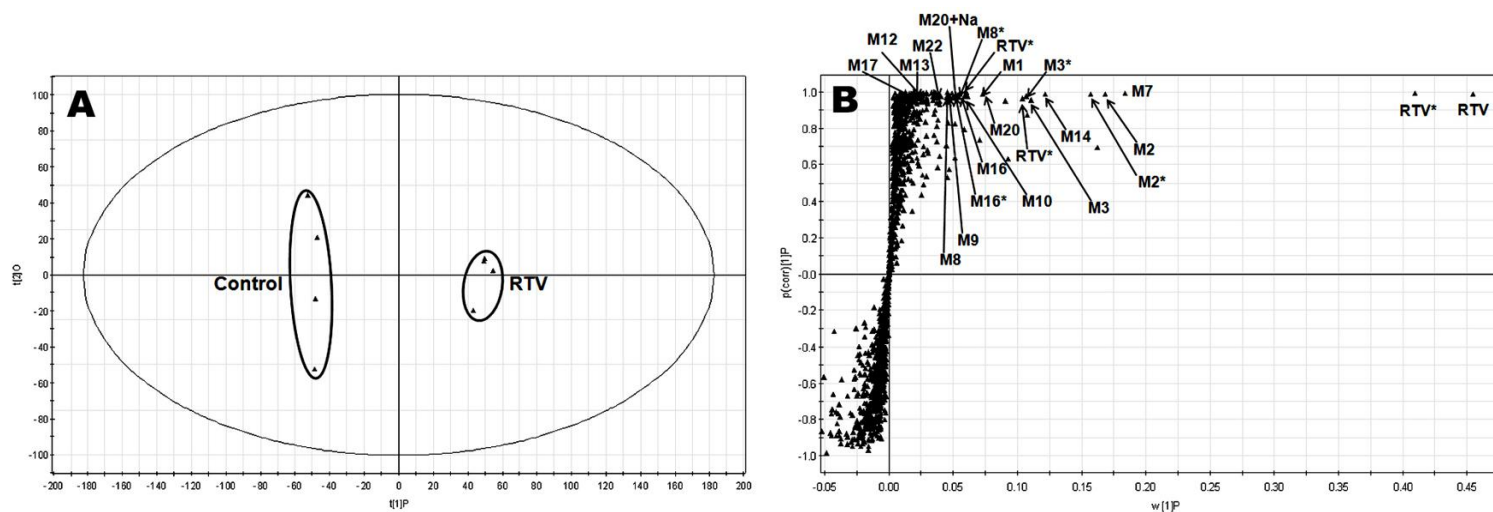

**Supplemental Figure 2. Identification of M1-1 and M1-2.** M1-1 and M1-2 were detected in the urine of mice treated with RTV. In addition, the incubation of RTV in HLM was conducted to trap 2-isopropylthiazole-4-carbaldehyde, a precursor of M1-1 and M1-2. Methoxyamine was used as a trapping reagent. Structural elucidations were performed on the basis of accurate mass measurement and MS/MS fragmentations. Major daughter ions were interpreted in the inlaid structural diagrams. (A) MS/MS of M1-1. (B) MS/MS of M1-2. (C) MS/MS of methoxyamine trapped product of 2-isopropylthiazole-4-carbaldehyde.

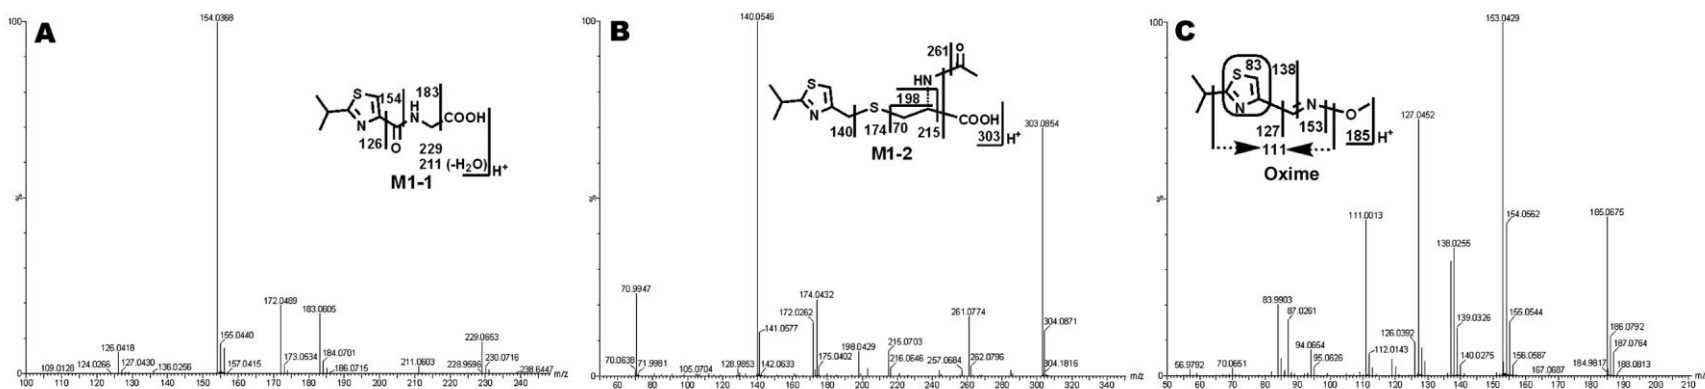

**Supplemental Figure 3. Identification of (2-isopropylthiazol-4-yl)methanol and 2-isopropylthiazole-4-carboxylic acid.** WT mice were treated with RTV (25 mg/kg) or 2-isopropylthiazole-4-carbaldehyde (10 mg/kg). The urine samples were collected 18 h after the treatment. All samples were analyzed by UPLC-TOFMS. Structural elucidation was performed by accurate mass and MS/MS fragments. (A) Extracted chromatograms of (2-isopropylthiazol-4-yl)methanol and 2-isopropylthiazole-4-carboxylic acid from RTV treated mouse urine. (B) Extracted chromatograms of (2-isopropylthiazol-4-yl)methanol and 2-isopropylthiazole-4-carboxylic acid from 2-isopropylthiazole-4-carbaldehyde treated mouse urine. (C) MS/MS of (2-isopropylthiazol-4-yl)methanol. (D) MS/MS of 2-isopropylthiazole-4-carboxylic acid.

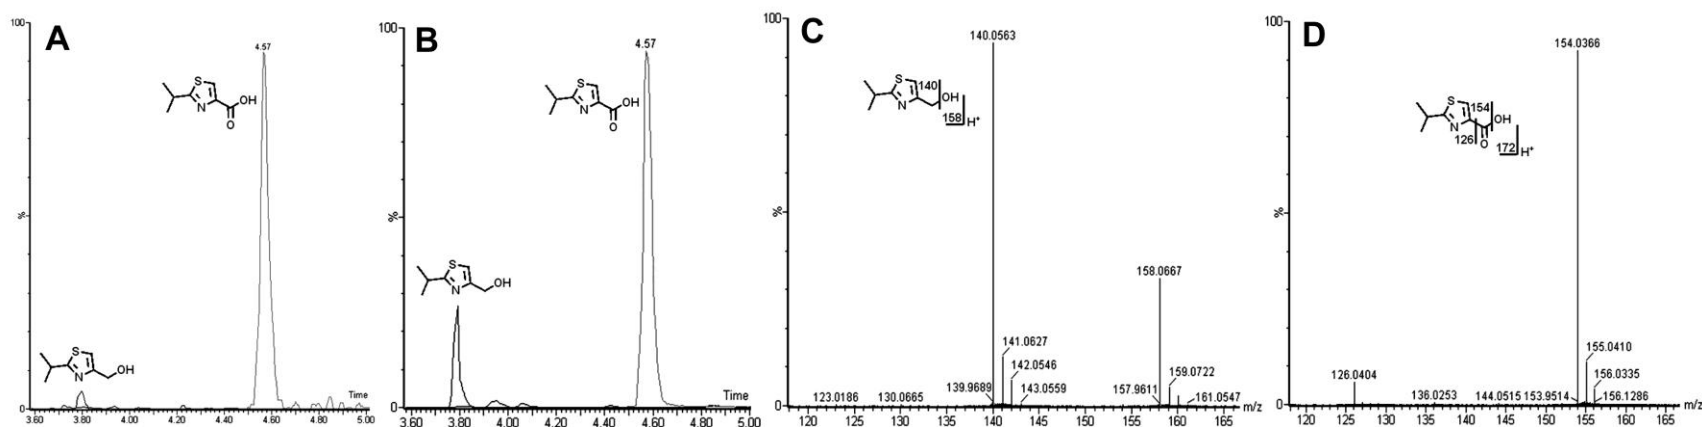

**Supplemental Figure 4. Identification of M7-1 and M7-2.** M7-1 and M7-2 were detected in the urine of mice treated with RTV.

Structural elucidations were performed on the basis of accurate mass measurement and MS/MS fragmentations. (A) Extracted chromatograms of M7-1 and M7-2. (B) MS/MS of M7-1. (C) MS/MS of M7-2.

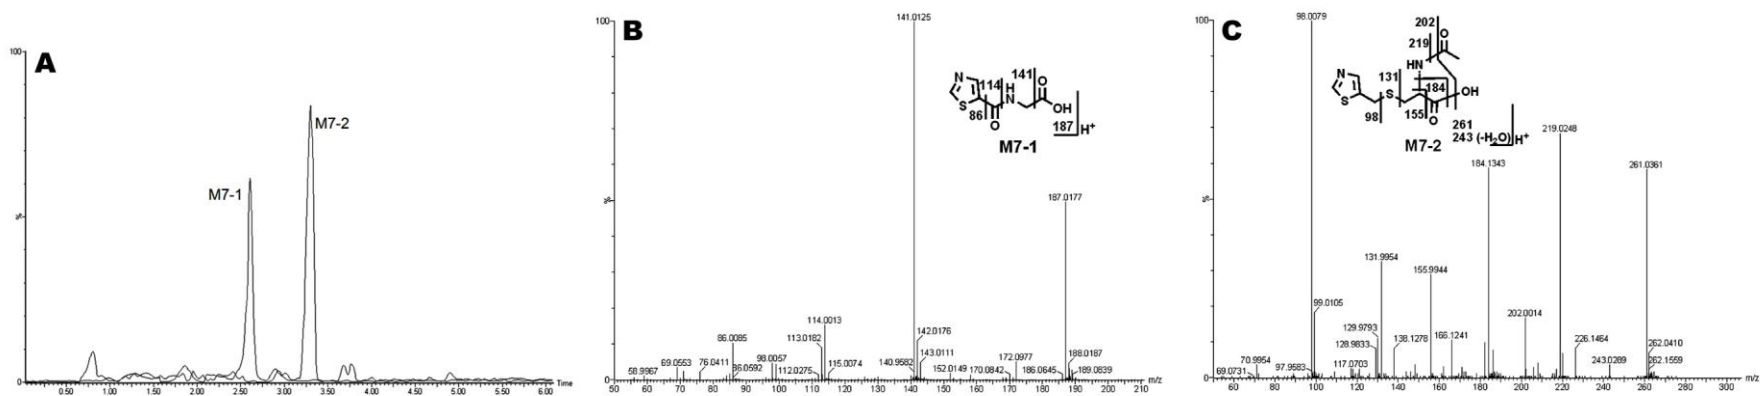

**Supplemental Figure 5. Identification of isopropylthiazole ring-open metabolite M13.** Metabolite M13 was recapitulated in the incubations of RTV or RTV-D<sub>6</sub> in HLM. Structural elucidations were based on accurate mass measurement and MS/MS fragmentations. (A) Extracted chromatograms of M13 generated from the incubations of RTV and RTV-D<sub>6</sub> in HLM. (B) MS/MS of M13.

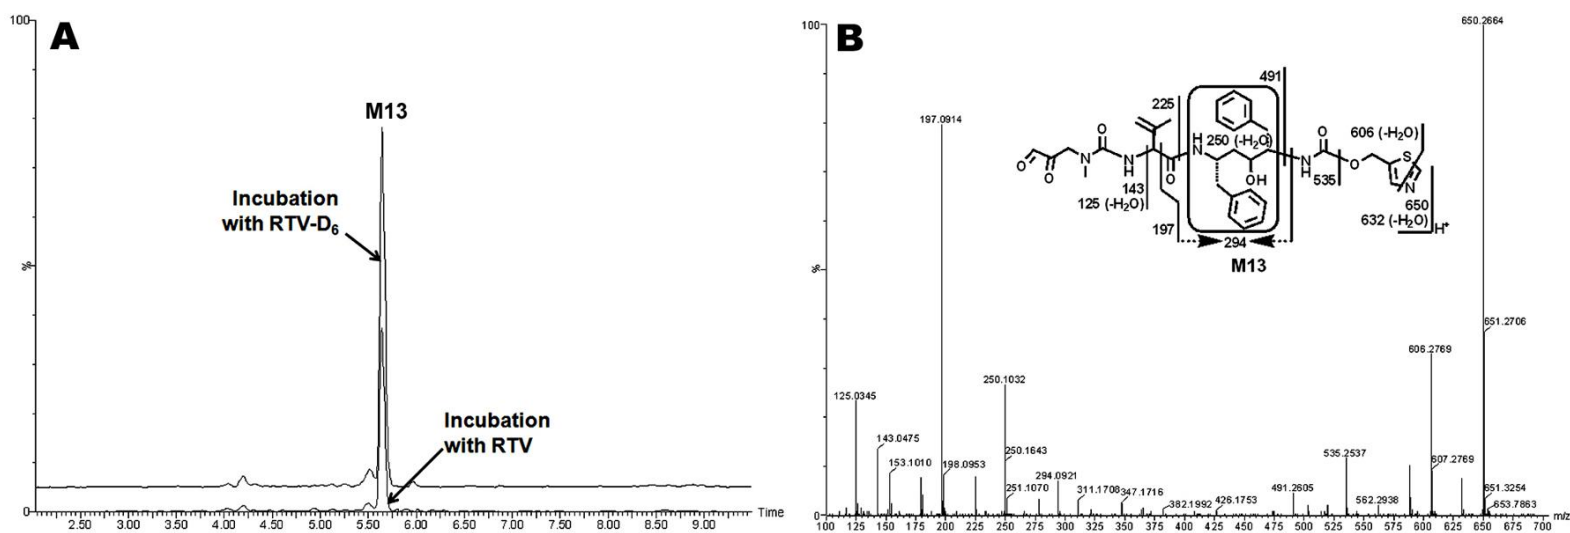

**Supplemental Scheme 1. The structures of RTV and RTV-D<sub>6</sub>**

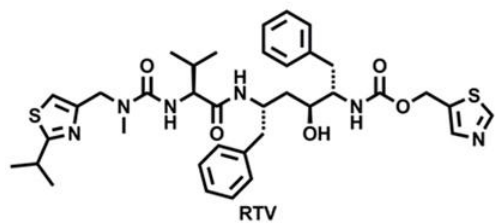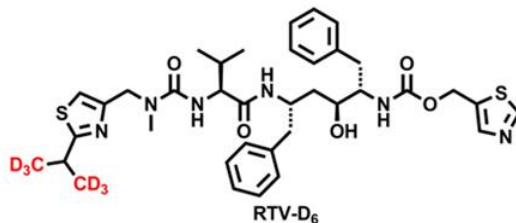

**Supplemental Scheme 2. Possible mechanism of M1-1 and M1-2 formation.** 2-Isopropylthiazole-4-carbaldehyde is generated from RTV spontaneously with M1, and it is trapped by methoxylamine ( $\text{CH}_3\text{ONH}_2$ ). 2-Isopropylthiazole-4-carbaldehyde is oxidized to an acid and conjugated with glycine to form M1-1. In the mean time, 2-isopropylthiazole-4-carbaldehyde is reduced to an alcohol that can be further sulfated. Sulfate anion serves as a leaving group that will be attacked by GSH. The GSH-conjugated metabolite is degraded to M1-2.

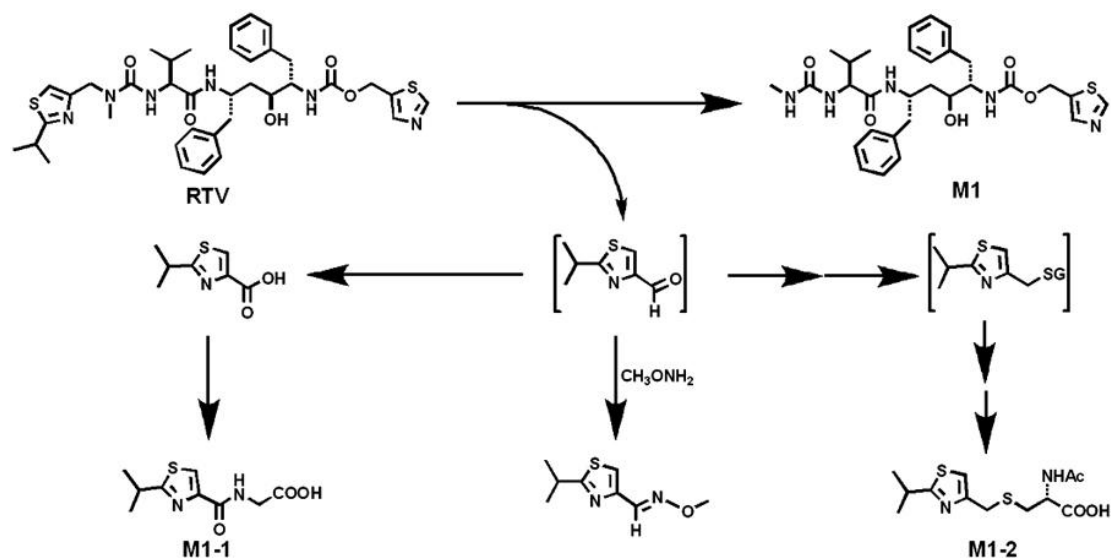



**Supplemental Scheme 3. Possible mechanism of M12 and M17 formation.** The thiazole ring undergoes epoxidation of the C=C double bond to form epoxide. The resulting diol is then decomposed to form corresponding  $\alpha$ -keto aldehydes (M12 and 17) and methanethioamide. M2 is the most abundant RTV metabolite in humans (11). The formation of M17 is initiated from M2.

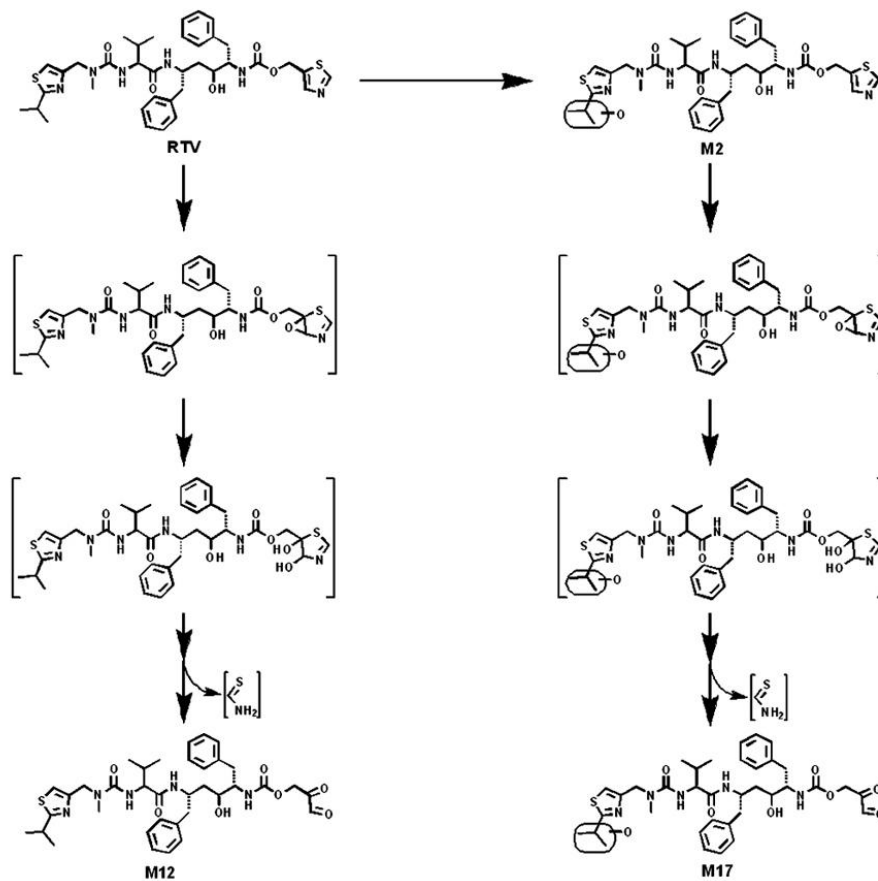

Supplement: NIHMS336336-supplement-1_si_001.pdf [file NIHMS336336-supplement-1_si_001.pdf]
